# Supplementary material for: LC-MS-based metabolomics revealed SLC25A22 as an essential regulator of aspartate-derived amino acids and polyamines in KRAS-mutant colorectal cancer
Source: PubMed Central journal article supplement (PMC5731878; doi:10.18632/oncotarget.21093), 2017-09-20
Supplement: oncotarget-08-101333-s001.pdf [file oncotarget-08-101333-s001.pdf]

## LC-MS-based metabolomics revealed SLC25A22 as an essential regulator of aspartate-derived amino acids and polyamines in KRAS-mutant colorectal cancer

### SUPPLEMENTARY MATERIALS

#### MATERIALS AND METHODS

##### LC-MS conditions in global metabolomics analysis

The LC gradient program was as follows: 0 min, 2% B; 1 min, 2% B; 19 min, 100% B; 21 min, 100 % B; 21.1 min, 2% B; 25 min, 2% B. The flow rate was 0.3 mL/ min. The QE Focus MS was equipped with a heated electrospray ionization (HESI) source. The MS parameters were as follows. The spray voltages were 3.5 kV for positive ion mode and 3 kV for negative ion mode, respectively. The pressure of sheath and auxiliary gas was set at 45 arb and 10 arb, respectively. The temperatures of capillary and auxiliary gas were both 320°C. The S-lens RF level was 60%. The scan range was 70–1000 (*m/z*). The resolution was 35,000. The maximum inject time (max IT) was 100 ms. Automated gain control (AGC) was set at  $1 \times e^6$  ions.

##### LC-MS conditions in targeted metabolomics analysis (1)

The mobile phases used for the separation of TCA cycle intermediates, related amino acids and polyamines were water (A) and ACN (B) both containing 0.1% FA,

while for the TCA cycle intermediates were water/ACN (A, v/v, 95:5, pH 9.45) containing 20 mM ammonium acetate and 20 mM ammonium hydroxide and acetonitrile (B). The flow rate was 0.3 mL/min. The LC gradient program was as follows: 0 min, 85% B; 12 min, 55% B; 14 min, 20% B; 16 min, 20% B; 16.5 min, 85 % B; 22 min, 85% B. The TSQ MS was also equipped with a heated electrospray ionization (HESI) source. The data were collected by using selected monitoring reaction (SRM) mode (Supplementary Table 1). The spray voltages were of 3.5 kV and 3 kV in positive and negative ion mode, respectively. The pressure of sheath and auxiliary gas was set at 30 arb and 10 arb. The temperature of capillary and auxiliary gas was 320°C and 320°C. The CID gas was set at 1.5 mTorr.

**Supplementary Table 1: SRM transitions of TCA cycle intermediates, polyamines and related amino acids in targeted metabolomics analysis by LC-QqQ-MS**

|                         | Metabolite                                                         | Abbreviations | Polarity | Precursor Ion | Product Ion | CE <sup>a</sup> (V) |
|-------------------------|--------------------------------------------------------------------|---------------|----------|---------------|-------------|---------------------|
| TCA cycle Intermediates | Citrate                                                            | Cit           | Negative | 191           | 87          | 25                  |
|                         | Isocitrate                                                         | Isocit        | Negative | 191           | 73          | 25                  |
|                         | $\alpha$ -ketoglutarate                                            | $\alpha$ -KG  | Negative | 145           | 101         | 8                   |
|                         | Succinate                                                          | Suc           | Negative | 117           | 73          | 15                  |
|                         | Fumarate                                                           | Fum           | Negative | 115           | 71          | 10                  |
|                         | Malate                                                             | Mal           | Negative | 133           | 115         | 12                  |
|                         | Oxaloacetate                                                       | OAA           | Negative | 131           | 87          | 15                  |
|                         | Aspartate                                                          | Asp           | Negative | 132           | 88          | 15                  |
|                         | 4-Cl-Phenylalanine                                                 | ISb           | Negative | 198           | 181         | 15                  |
| Related amino acids     | Glutamate                                                          | Glu           | Positive | 148           | 84          | 15                  |
|                         | Glutamine                                                          | Gln           | Positive | 147           | 84          | 10                  |
|                         | Asparagine                                                         | Asn           | Positive | 133           | 74          | 15                  |
|                         | Alanine                                                            | Ala           | Positive | 90            | 44.3        | 10                  |
|                         | Proline                                                            | Pro           | Positive | 116           | 70          | 18                  |
|                         | Ornithine                                                          | Orn           | Positive | 133           | 70          | 20                  |
|                         | Citrulline                                                         | Citr          | Positive | 176           | 70          | 10                  |
|                         | Arginine                                                           | Arg           | Positive | 175           | 70          | 15                  |
| Polyamines              | Putrescine                                                         | Put           | Positive | 89.1          | 72.1        | 12                  |
|                         | <i>N</i> <sup>l</sup> -Acetylputrescine                            | AcPut         | Positive | 131.1         | 114.2       | 12                  |
|                         | <i>N</i> <sup>l</sup> -Acetylputrescine                            | AcPut         | Positive | 131.1         | 72.1        | 18                  |
|                         | Spermidine                                                         | Spd           | Positive | 146.1         | 72.1        | 15                  |
|                         | Spermidine-2                                                       | Spd           | Positive | 146.1         | 112.1       | 15                  |
|                         | <i>N</i> <sup>l</sup> -Acetylspermidine                            | AcSpd         | Positive | 188.2         | 72.1        | 20                  |
|                         | <i>N</i> <sup>l</sup> -Acetylspermidine-2                          | AcSpd         | Positive | 188.2         | 100.1       | 18                  |
|                         | Spermine                                                           | Spm           | Positive | 203.2         | 112.1       | 20                  |
|                         | Spermine-2                                                         | Spm           | Positive | 203.2         | 129.1       | 12                  |
|                         | <i>N</i> <sup>l</sup> -Acetylspermine                              | AcSpm         | Positive | 245.2         | 129.2       | 15                  |
|                         | <i>N</i> <sup>l</sup> -Acetylspermine-2                            | AcSpm         | Positive | 245.2         | 112.2       | 20                  |
|                         | <i>N</i> <sup>l</sup> , <i>N</i> <sup>l2</sup> -diacetylspermine   | DAS           | Positive | 287.2         | 100.1       | 25                  |
|                         | <i>N</i> <sup>l</sup> , <i>N</i> <sup>l2</sup> -diacetylspermine-2 | DAS           | Positive | 287.2         | 171.2       | 18                  |
|                         | IS                                                                 |               | Positive | 200           | 154         | 15                  |

Notes: <sup>a</sup>represents collision energy, <sup>b</sup>represented internal standard.

**Supplementary Table 2: SRM transitions of polyamines and amino acids in isotope kinetic analysis by LC-QqQ-MS**

| Class                                | Metabolite                             | Polarity | Precursor Ion | Product Ion | CE (V) |
|--------------------------------------|----------------------------------------|----------|---------------|-------------|--------|
| Related amino acids                  | Gln                                    | Positive | 147           | 84          | 20     |
|                                      | <sup>13</sup> C <sub>5</sub> -Gln      | Positive | 152           | 88          | 20     |
|                                      | Glu                                    | Positive | 148           | 84          | 15     |
|                                      | <sup>13</sup> C <sub>5</sub> -Glu      | Positive | 153           | 88          | 15     |
|                                      | Asp                                    | Positive | 134           | 74          | 15     |
|                                      | <sup>13</sup> C <sub>4</sub> -Asp      | Positive | 138           | 76          | 15     |
|                                      | Asn                                    | Positive | 133           | 74.2        | 15     |
|                                      | <sup>13</sup> C <sub>4</sub> -Asn      | Positive | 137           | 76          | 15     |
|                                      | Ala                                    | Positive | 90            | 44.3        | 10     |
|                                      | <sup>13</sup> C <sub>3</sub> -Ala      | Positive | 93            | 46.3        | 10     |
|                                      | Pro                                    | Positive | 116           | 70          | 18     |
|                                      | <sup>13</sup> C <sub>5</sub> -Pro      | Positive | 121           | 74          | 18     |
|                                      | Orn                                    | Positive | 133.1         | 70          | 20     |
|                                      | <sup>13</sup> C <sub>5</sub> -Orn      | Positive | 138           | 74          | 20     |
| Urea cycle amino acids               | Arg                                    | Positive | 175           | 70.2        | 15     |
|                                      | <sup>13</sup> C <sub>5</sub> -Arg      | Positive | 180           | 74          | 15     |
|                                      | Citr                                   | Positive | 176           | 159.1       | 10     |
|                                      | <sup>13</sup> C <sub>5</sub> -Citr     | Positive | 181           | 163.1       | 10     |
|                                      | IS                                     | Positive | 200           | 154         | 15     |
|                                      | Put                                    | Positive | 89.1          | 72.1        | 12     |
|                                      | Put- <sup>13</sup> C <sub>4</sub>      | Positive | 93.1          | 76.1        | 12     |
|                                      | AcPut                                  | Positive | 131.1         | 114.2       | 12     |
|                                      | AcPut-2                                | Positive | 131.1         | 72.1        | 18     |
|                                      | AcPut- <sup>13</sup> C <sub>4</sub> *  | Positive | 135.1         | 118.1       | 12     |
|                                      | AcPut- <sup>13</sup> C <sub>4</sub> -2 | Positive | 135           | 76.1        | 18     |
|                                      | Spd*                                   | Positive | 146.1         | 72.1        | 15     |
|                                      | Spd-2                                  | Positive | 146.1         | 112.1       | 15     |
|                                      | Spd- <sup>13</sup> C <sub>4</sub> *    | Positive | 150.1         | 76.1        | 15     |
| Spd- <sup>13</sup> C <sub>4</sub> -2 | Positive                               | 150.1    | 116.1         | 15          |        |
| Polyamines                           | AcSpd*                                 | Positive | 188.2         | 72.1        | 20     |
|                                      | AcSpd-2                                | Positive | 188.2         | 100.1       | 18     |
|                                      | AcSpd- <sup>13</sup> C <sub>4</sub> *  | Positive | 192.2         | 76.1        | 20     |
|                                      | AcSpd- <sup>13</sup> C <sub>4</sub> -2 | Positive | 192.2         | 104.1       | 18     |
|                                      | Spm*                                   | Positive | 203.2         | 112.1       | 20     |
|                                      | Spm-2                                  | Positive | 203.2         | 129.1       | 12     |
|                                      | Spm- <sup>13</sup> C <sub>4</sub> *    | Positive | 207.2         | 116.1       | 20     |
|                                      | Spm- <sup>13</sup> C <sub>4</sub> -2   | Positive | 207.2         | 133.1       | 12     |
|                                      | AcSpm*                                 | Positive | 245.2         | 112.2       | 20     |
|                                      | AcSpm-2                                | Positive | 245.2         | 129.2       | 15     |
|                                      | AcSpm- <sup>13</sup> C <sub>4</sub> *  | Positive | 249.2         | 116.2       | 20     |
|                                      | AcSpm- <sup>13</sup> C <sub>4</sub>    | Positive | 249.2         | 133.2       | 15     |
|                                      | DAS*                                   | Positive | 287.2         | 100.1       | 25     |
|                                      | DAS-2                                  | Positive | 287.2         | 171.2       | 18     |
| DAS- <sup>13</sup> C <sub>4</sub> *  | Positive                               | 291.2    | 104.1         | 25          |        |
| DAS- <sup>13</sup> C <sub>4</sub> -2 | Positive                               | 291.2    | 175.2         | 18          |        |

Notes:

<sup>a</sup>represents collision energy, \* represented quantitative transition, while the other transition was qualitative transition.

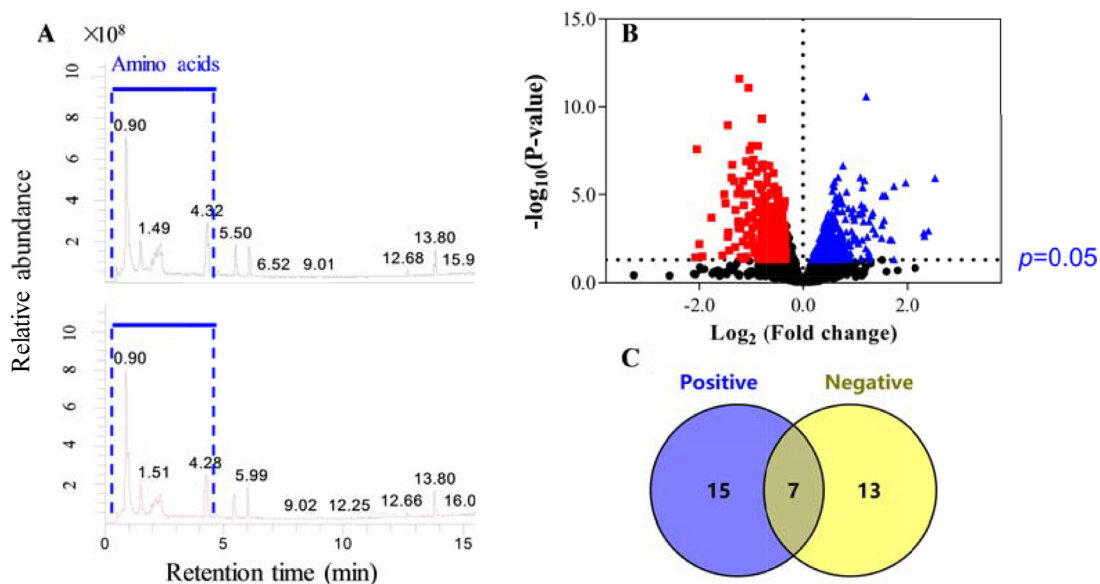

**Supplementary Figure 1: The total ion chromatogram (TIC), volcano plot and Venn diagram of changed metabolites.**

(A) The total ion chromatogram (TIC) of control (pLKO, upper) and knockdown of SLC25A22 (shSLC25A22, lower) cells in positive ion mode of UHPLC-MS. (B) Volcano plot of global metabolomics data in positive mode. The X-axis was plotted on  $\log_2$  scale of fold change (FC) of shSLC25A22/pLKO, while the Y-axis plotted the  $-\log_{10}$  scale of  $p$ -value. The blue triangle represented metabolic features with FC less than 0.8 and  $p$ -value less than 0.05, and the red square represented metabolic features with FC over than 1.1 and  $p$ -value less than 0.05. (C) Venn diagram of identified metabolites both in positive and negative ion mode of UHPLC-MS. Twenty-two and 20 metabolites were found in positive and negative mode of LC-MS, respectively; and 7 metabolites were simultaneously detected in two modes

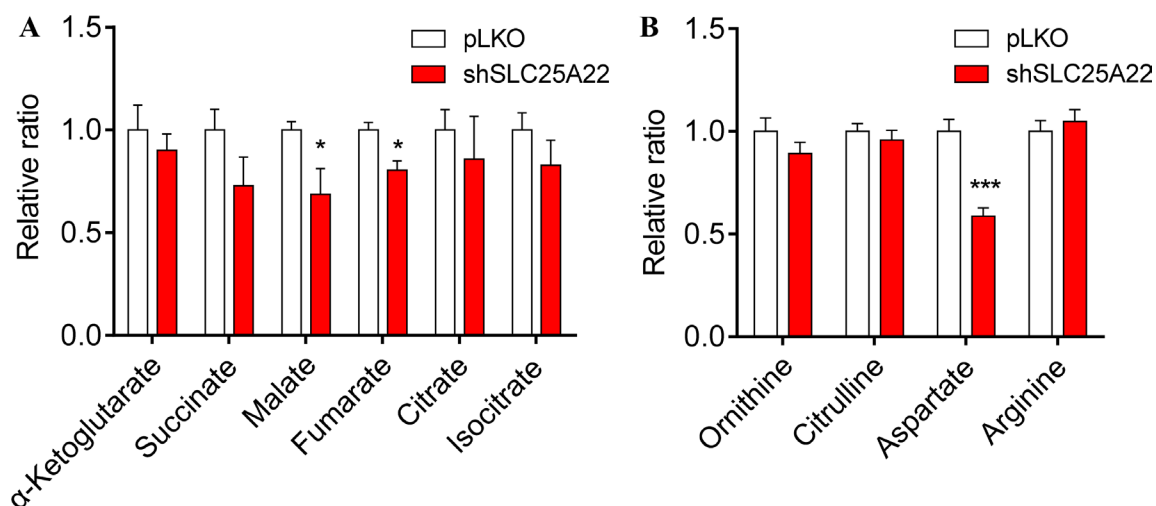

**Supplementary Figure 2: Relative ratio of targeted metabolites between pLKO and shSLC25A22 cells.** (A) TCA cycle intermediates, (B) urea cycle metabolites. \* $p < 0.05$ , \*\* $p < 0.01$ , and \*\*\* $p < 0.001$ . Error bar represented the SEM.

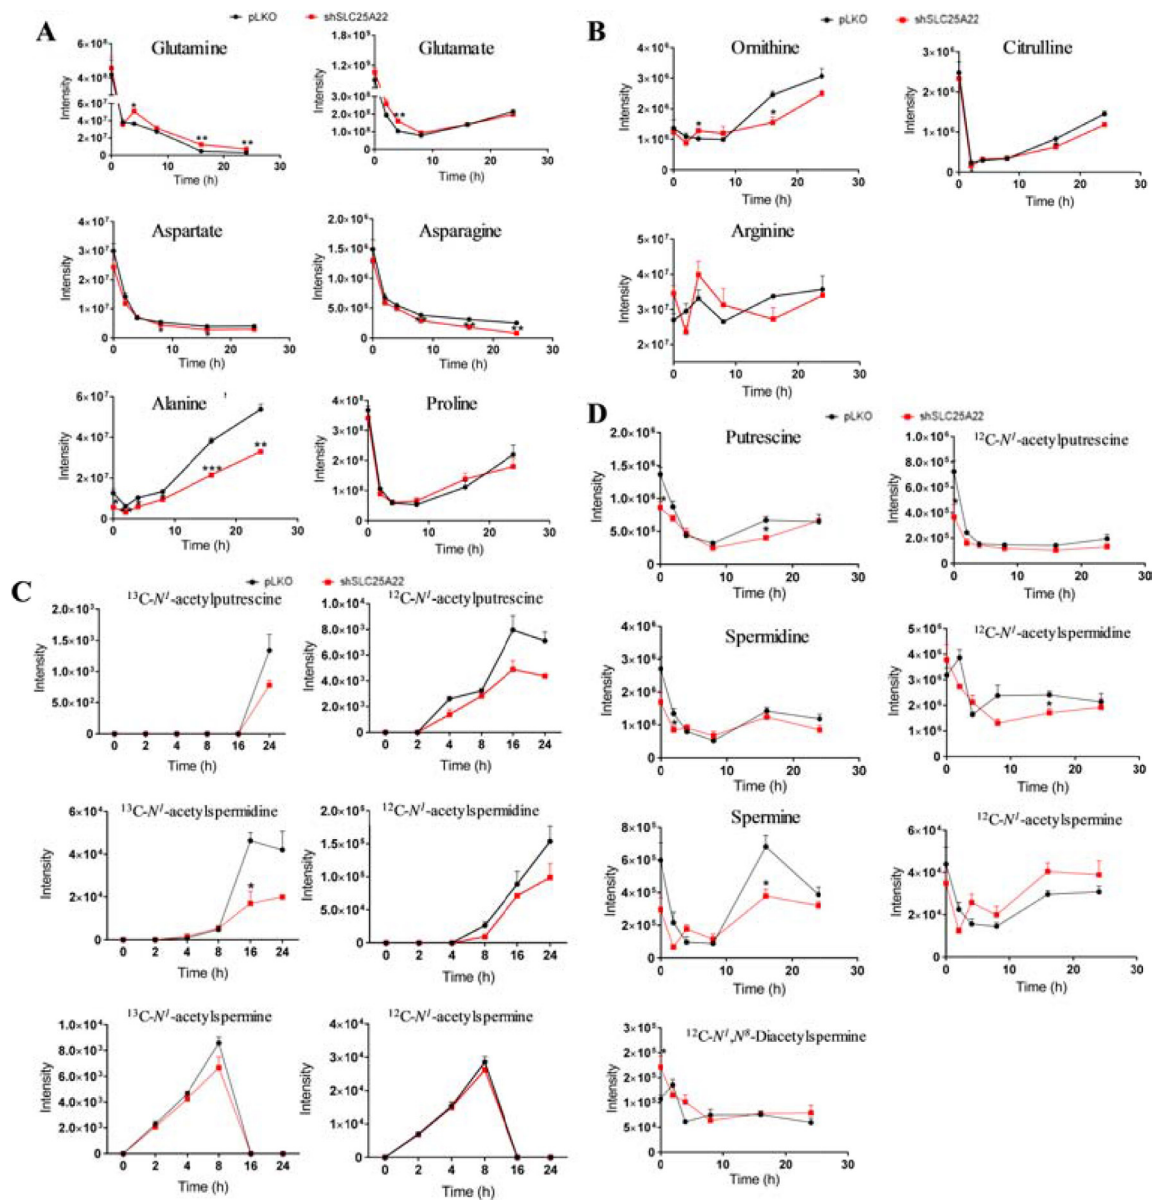

**Supplementary Figure 3: Kinetic isotope analysis between pLKO and shSLC25A22 cells.** (A) Flux of native amino acids related to TCA cycle intermediates in DLD1 cells; (B) Flux of native urea cycle intermediates in DLD1 cells; (C) Flux of  $^{13}\text{C}$ -labeled and native acetylated polyamines in medium; (D) Relative ratio of native polyamines in DLD1 cells. \* $p < 0.05$ , \*\* $p < 0.01$ , and \*\*\* $p < 0.001$ . Error bar represented the SEM.

## REFERENCES

1. Li X, et al. Determination of amino acids in colon cancer cells by using UHPLC-MS/MS and  $[\text{U-}^{13}\text{C}_3]$ -glutamine as the isotope tracer. *Talanta*. 2017; 162:285–292.
